# Supplementary material for: Thickening and Storage of Sewage Sludge Contribute to the Degradation of LAS and EOX and the Humification of Organic Matter
Source: MDPI journal article supplement (doi:10.3390/w13070933), 2021-03-29

Supplementary Material for:

# Thickening and storage of sewage sludge contribute to the degradation of LAS and EOX and the humification of organic matter

Ali Khakbaz <sup>1,2</sup>, Daniele Goi <sup>1</sup>, Carlo Bravo <sup>2</sup> and Marco Contin <sup>2</sup>

<sup>1</sup> Department Polytechnic of Engineering and Architecture, University of Udine, Via del Cotonificio 108, 33100 Udine, Italy; khakbaz.ali@spes.uniud.it

<sup>2</sup> Department of Agricultural, Food, Environmental and Animal Sciences (DI4A), University of Udine, Via delle Scienze 206, 33100 Udine, Italy

\* Correspondence: carlo.bravo@uniud.it

**Figure S1.** UV-vis spectra of HA and FA extracted from fresh (blue curves) and stored (red curves) P1 (a and b), P2 (c and d), P3 (e and f), P4 (g and h) sewage sludge samples.

**Figure S2.** FT-IR spectra (in transmittance) of HA and FA extracted from fresh (blue curves) and stored (red curves) P1 (a and b), P2 (c and d), P3 (e and f), P4 (g and h) sewage sludge samples.

Figure S1  
**HA**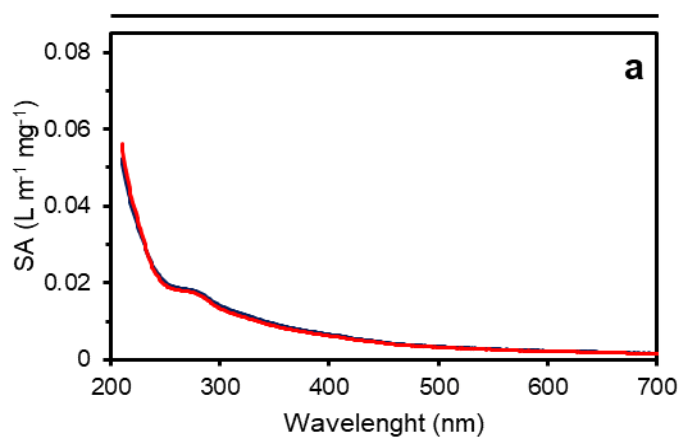**FA**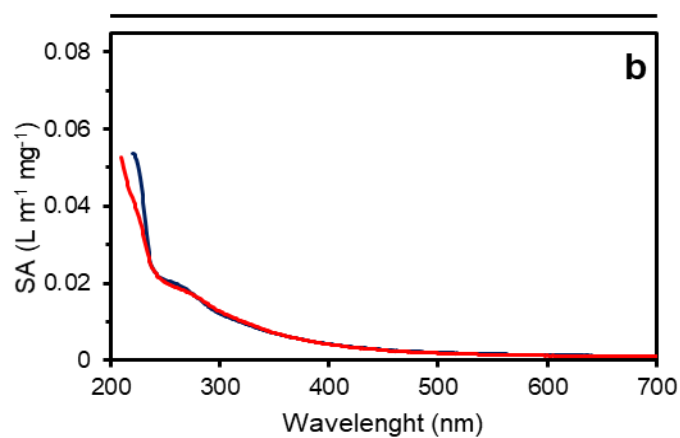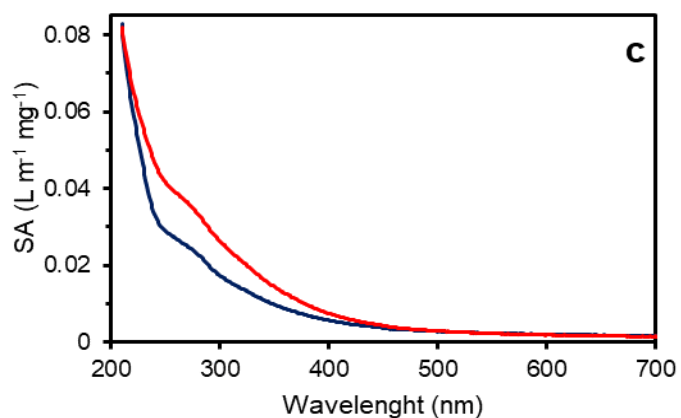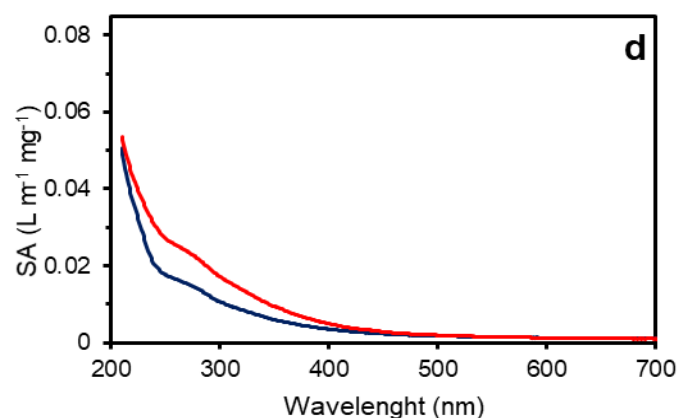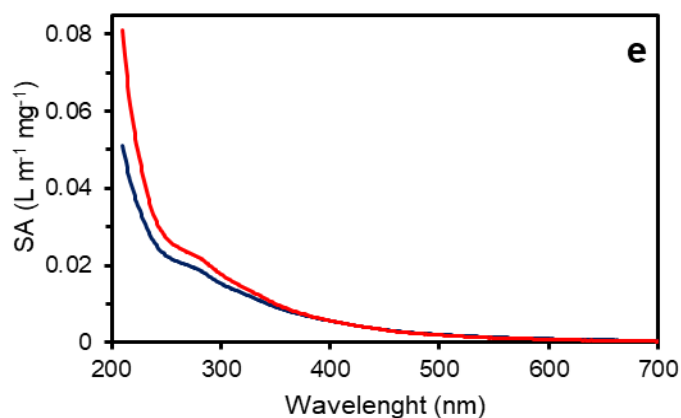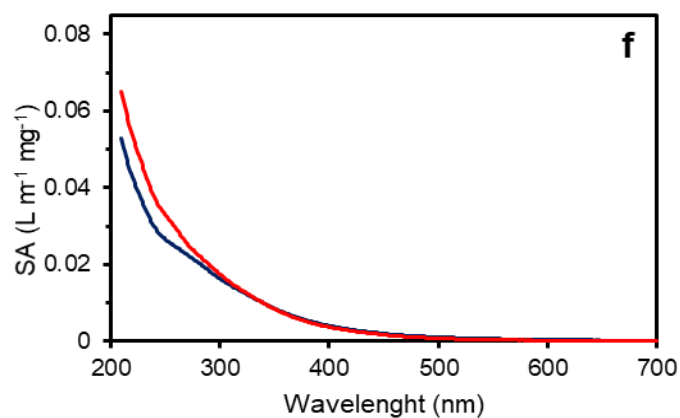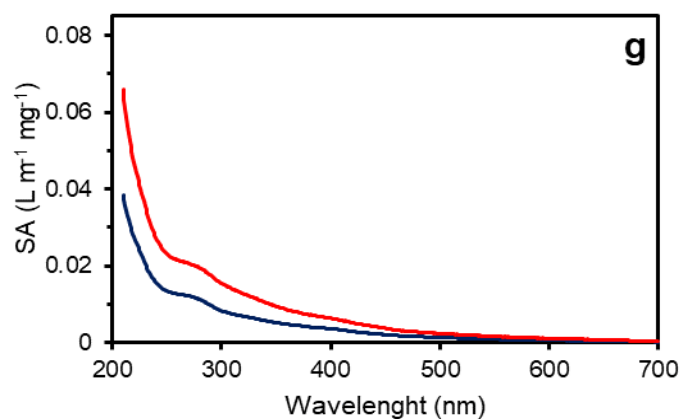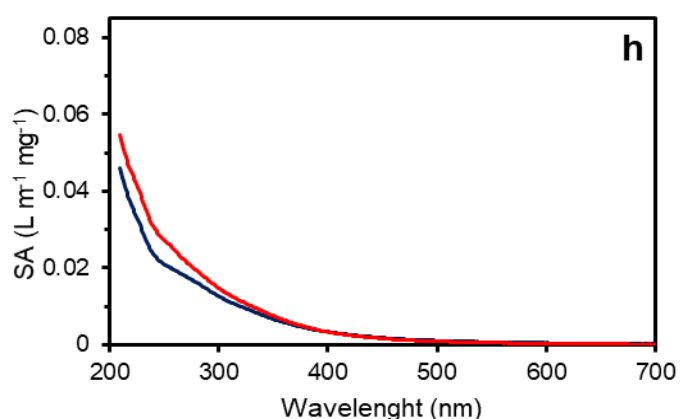

Figure S2

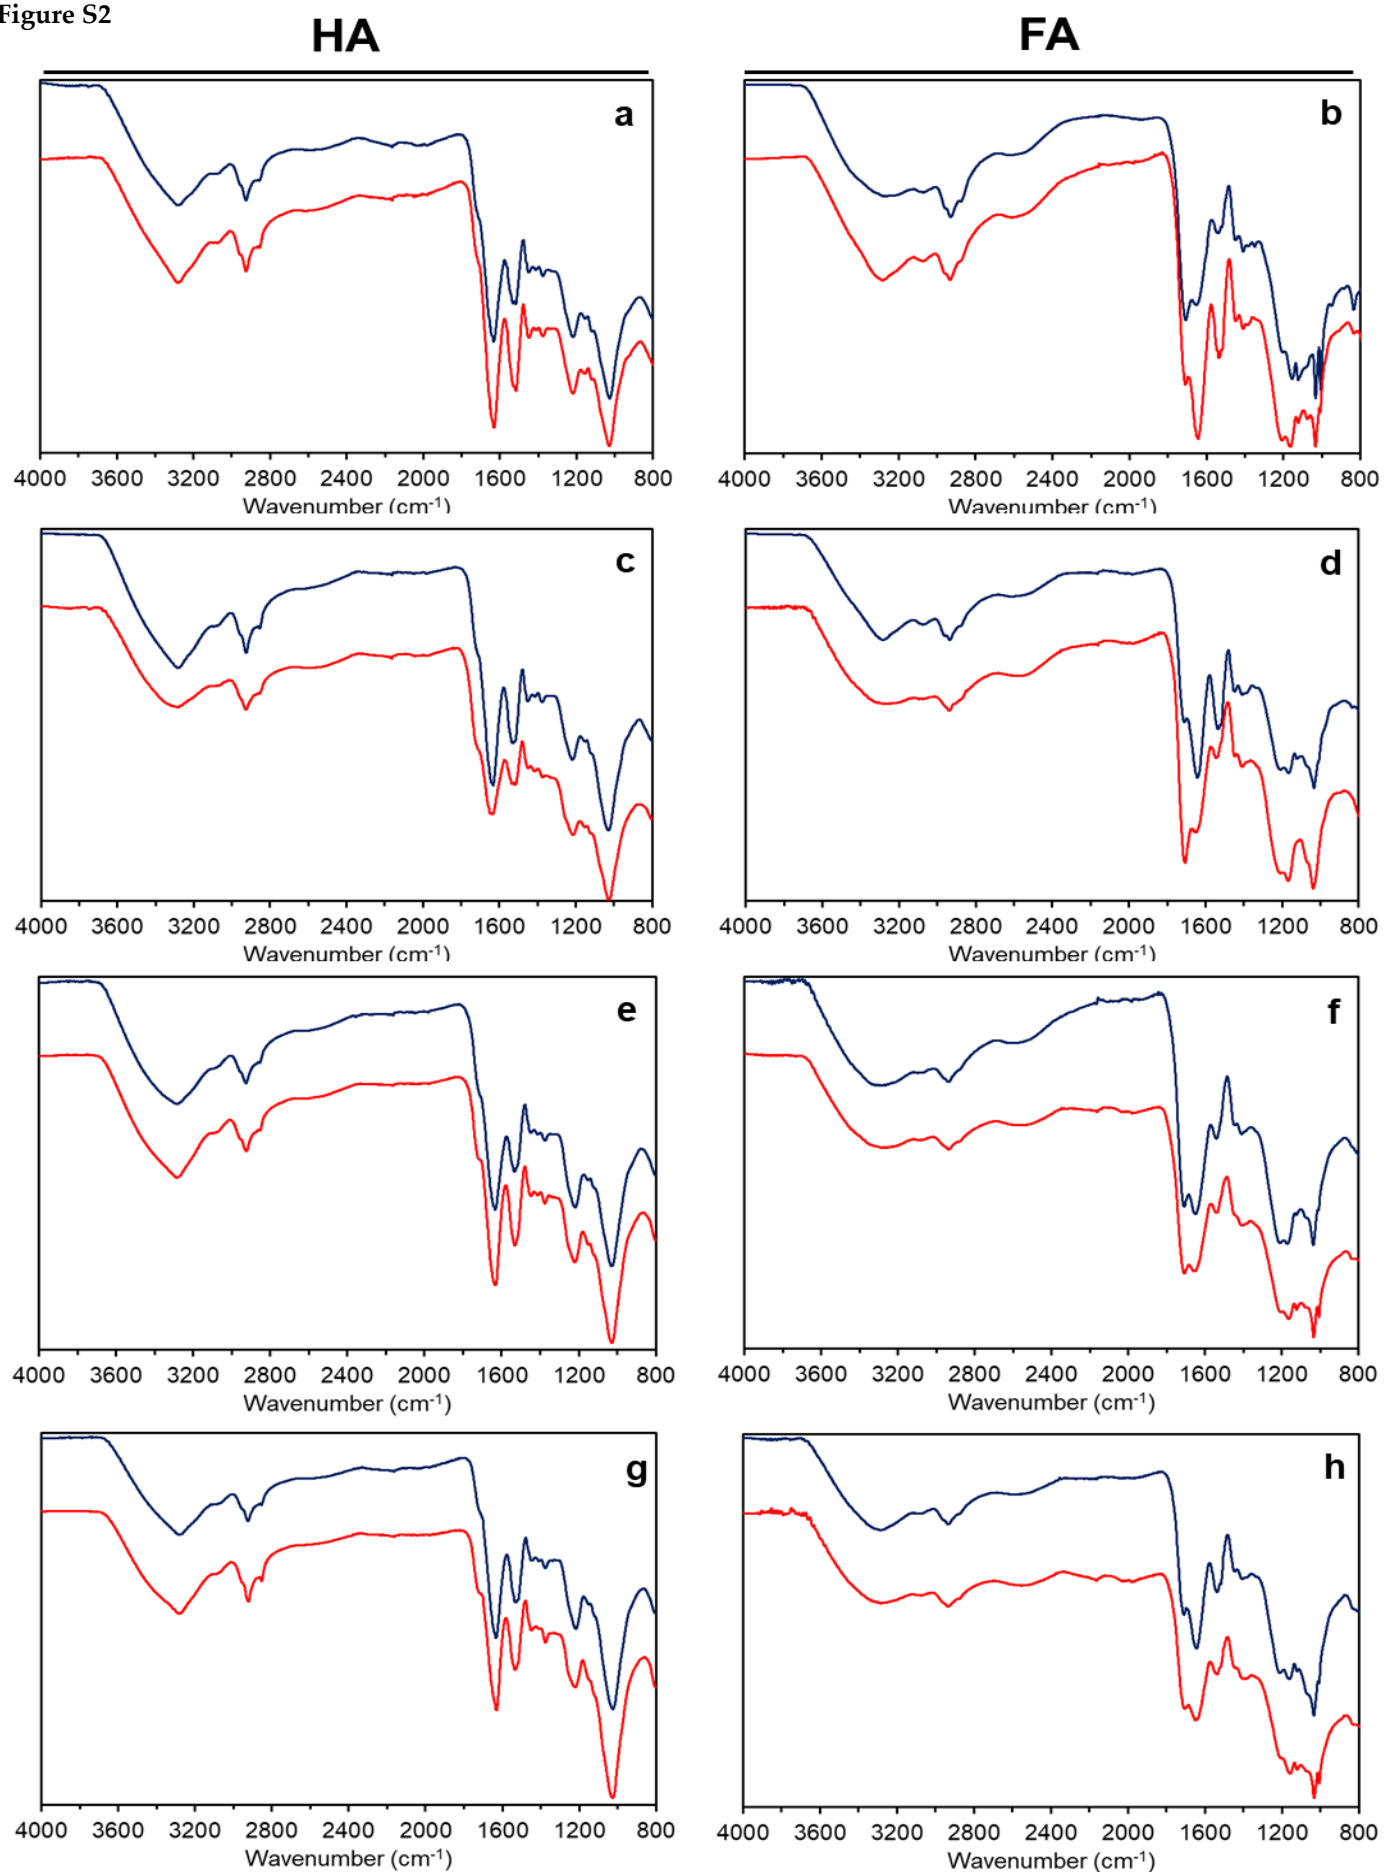

Supplement: s1 [file s1]
